# Supplementary material for: Development of a Binderless Particleboard from Brown Seaweed Sargassum spp
Source: MDPI journal article supplement (doi:10.3390/ma17030539), 2024-01-23
Supplement: s1 [file s1]

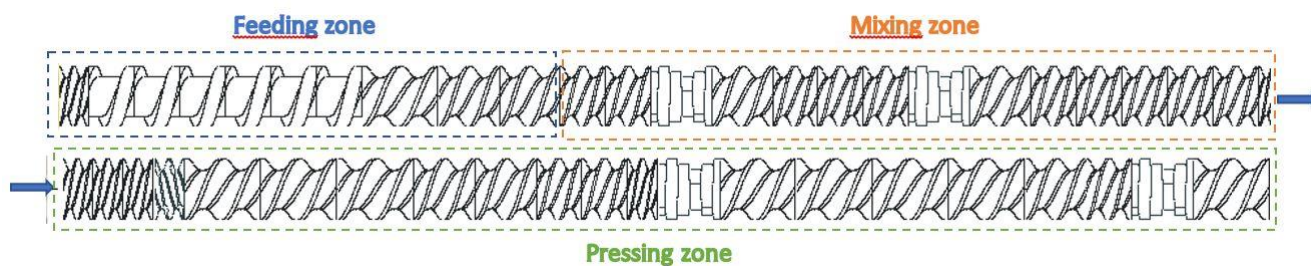

**Figure S1:** Screw profile used for *Sargassum* pre-treatment by twin screw extrusion

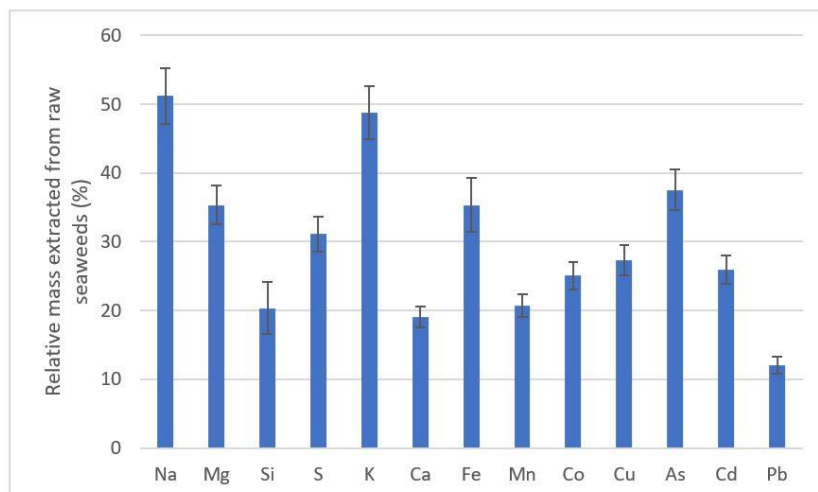

**Figure S2:** Elements extracted from raw seaweeds by twin-screw extrusion with water

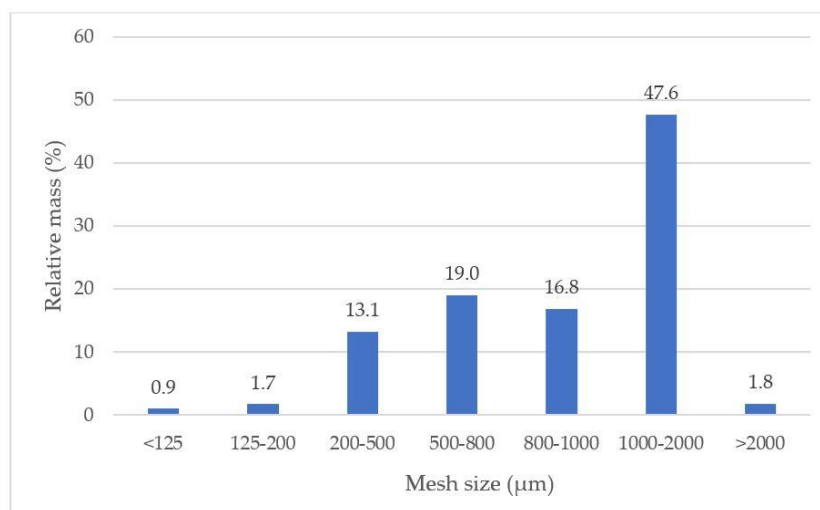

**Figure S3:** Particle size distribution in the extrudate

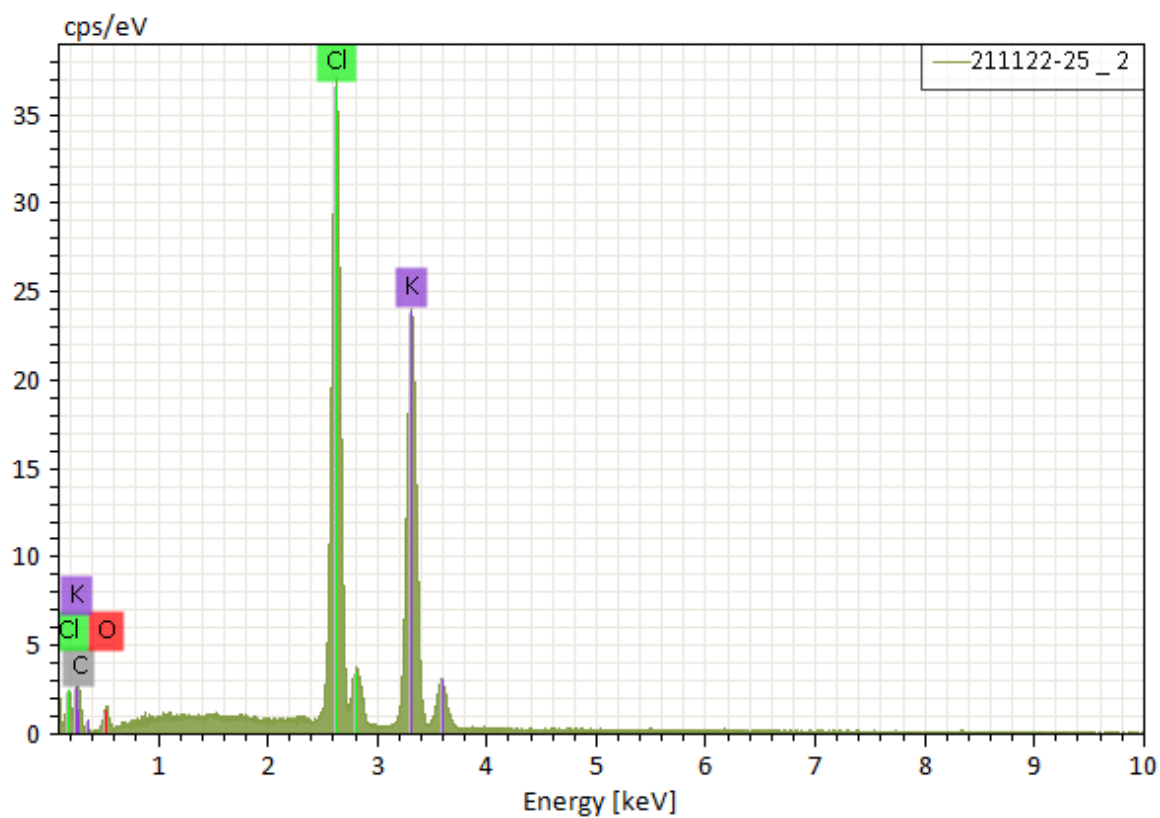

**Figure S4:** Elemental analysis of the particles observed at the surface of a particleboard by SEM

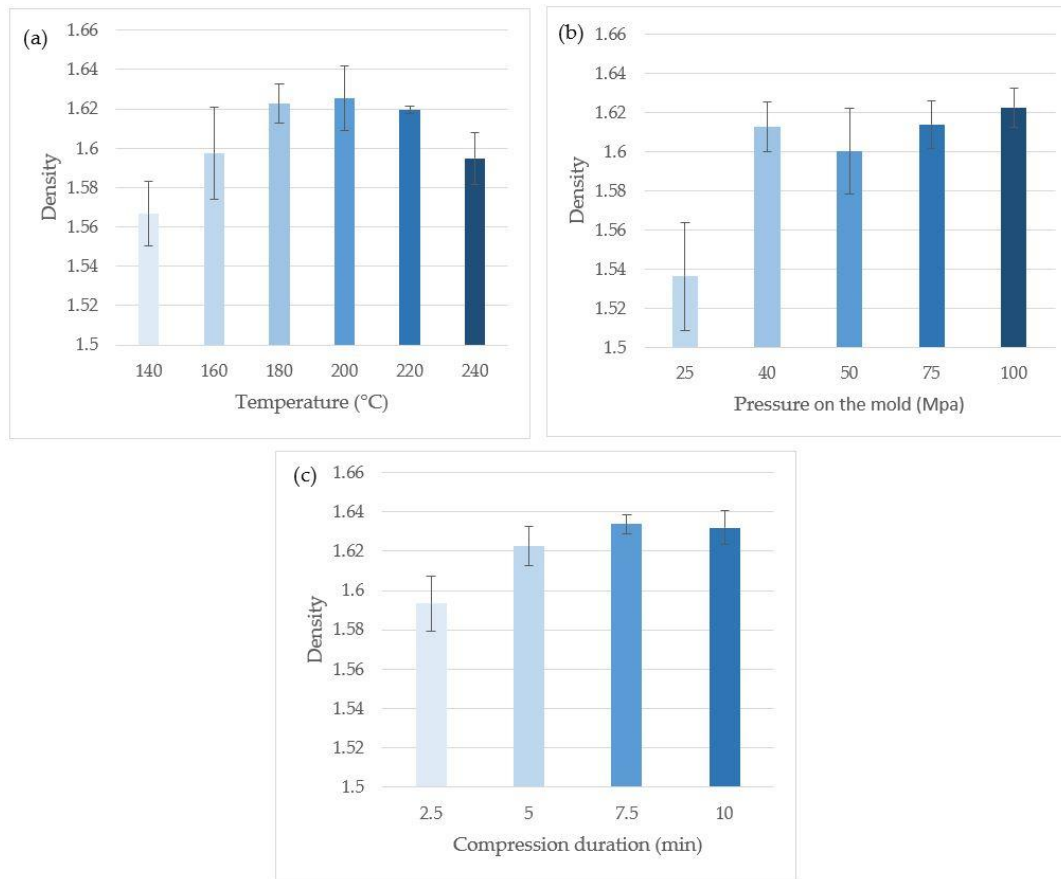

**Figure S5:** Influence of Temperature (a), pressure on the mold (b) and compression duration (c) on the density of *Sargassum*-based materials

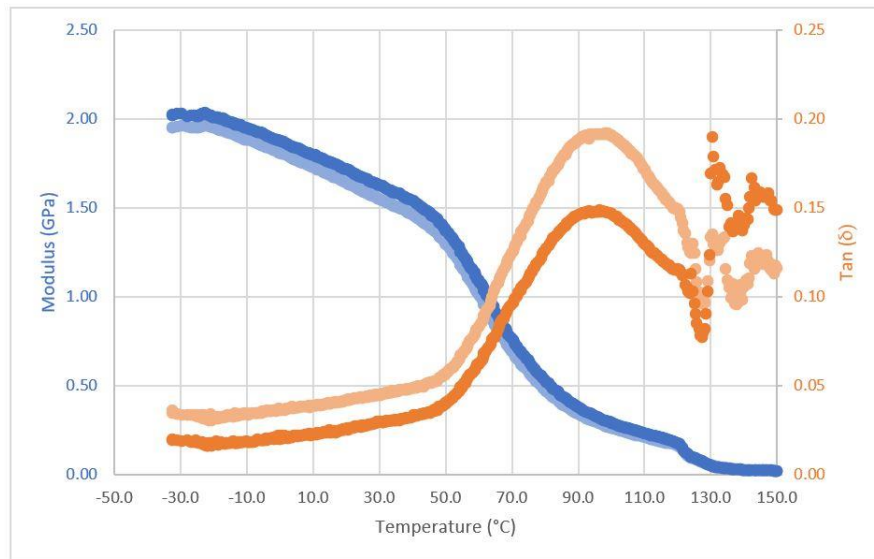

**Figure S6:** DMA analysis of a particleboard obtained with the best experimental conditions (200 °C, 100 Mpa, 7.5 min) (Lighter shade: 1 Hz oscillation, darker shade: 10Hz oscillation; blue: modulus, orange: loss modulus tan( $\delta$ ))
